- 1 **Title**: Reticulate evolution is favored in microbial niche switching
- 2 **Authors**: Eric J. Ma, Nichola J. Hill, Justin Zabilansky, Kyle Yuan, Jonathan A. Runstadler
- 3 **Affiliations**: Department of Biological Engineering, MIT
- 4

5 **Abstract**

6 Reticulate evolution is thought to accelerate the process of evolution beyond simple genetic drift  
7 and selection, helping to rapidly generate novel hybrids with combinations of adaptive traits.  
8 However, the long-standing dogma that reticulate evolutionary processes are likewise  
9 advantageous for switching ecological niches, as in microbial pathogen host switch events, has  
10 not been explicitly tested. We use data from the influenza genome sequencing project and a  
11 phylogenetic heuristic approach to show that reassortment, a reticulate evolutionary mechanism,  
12 predominates over mutational drift in transmission between different host species. Moreover, as  
13 host evolutionary distance increases, reassortment is increasingly favored. We conclude that the  
14 greater the quantitative difference between ecological niches, the greater the importance of  
15 reticulate evolutionary processes in overcoming niche barriers.

16 **Manuscript**

17 Reticulate evolutionary processes, such as horizontal gene transfer (HGT) and genomic  
18 reassortment, have been proposed as a major mechanism for microbial evolution (1), aiding in  
19 the diversification into new ecological niches (2). In contrast to clonal adaptation through genetic  
20 drift over time, reticulate evolutionary processes allow an organism to acquire independently  
21 evolved genetic material that can confer new fitness-enhancing traits. Examples include the  
22 acquisition of cell surface receptor adaptations (point mutations) in viruses (3), and antibiotic  
23 resistance (single genes) (4) and pathogenicity islands (or gene clusters) in bacteria (5). Host  
24 switching, defined as a pathogen moving from one host species into another, represents a strong  
25 fitness barrier to microbial pathogens. The acquisition of adaptations through reticulate processes  
26 either prior to or after transmission from one species to another may serve to aid successful  
27 pathogen host switches by improving fitness and the likelihood of continued transmission (6). In  
28 this sense, reticulate evolution may be viewed as an ecological strategy for switching between  
29 ecological niches (such as different host species), complementing but also standing in contrast to  
30 the clonal adaptation of a microbial pathogen by genetic drift under selection. In order to test this  
31 idea and its importance in host switch events, which are critical for (re-)emerging infectious  
32 disease, we provide a quantitative assessment of the relative importance of reticulate processes  
33 versus clonal adaptation in aiding the ecological niche switch of a viral pathogen

34 Data yielded from the influenza genome sequencing projects provides a unique opportunity for  
35 quantitatively testing this concept, and is suitable for the following reasons. Firstly, the influenza  
36 A virus (IAV) has a broad host tropism (7), and is capable of infecting organisms spanning  
37 millennia of divergence on the tree of life. With different host-specific restriction factors forming  
38 an adaptive barrier, each host species may then be viewed as a unique ecological niche for the

39 virus (8). Secondly, IAV is capable of and frequently undergoes reassortment, which is a well  
40 documented reticulate evolutionary process (9-12). Finally, due to surveillance efforts over the  
41 past two decades, whole genome sequences have been intensively sampled over a long time  
42 frame, with corresponding host species metadata, available in an easily accessible and structured  
43 format (13). Because reassortant viruses are the product of two or more genetically distinct  
44 viruses co-infecting the same host, a more complex process than clonal transmission and  
45 adaptation, they are expected to occur less frequently. Hence, the comprehensive IAV dataset,  
46 which stretches over time and space with large sample numbers, provides the necessary scope to  
47 detect reassortant viruses at a scale required to quantitatively assess the relative importance of  
48 reticulate events in viral host switching.

49 In order to identify reassortment events and the hosts species involved, we adapted a  
50 phylogenetic heuristic method (14), and mapped out a network of clonal and reassortment  
51 descent relationships from a comprehensive set of completely sequenced IAV (18,632 viral  
52 genomes) downloaded from the Influenza Research Database (13). Briefly, the core logic of the  
53 method is as such: for every isolate in the dataset, we look for genomic sources such that the  
54 sources found are of maximal similarity across all 8 genomic segments (Materials and Methods).  
55 Clonal descent involves single sources, while reassortment descent involves source pairs. Where  
56 multiple sources or source pairs correspond to the maximal similarity, all are kept as plausible  
57 sources. In the resulting network, nodes are individual viral isolates, and edges are the clonal or  
58 reassortment descent relationships.

59 In this network of viral isolates, clonal descent is mostly structured by host species, with known  
60 global patterns of human-to-human (H3N2 & H1N1, and rarer H5N1 & H7N9), chicken-to-  
61 chicken (H9N2, H7N9, H5N1) and swine-to-swine (H3N2, H1N1, H1N2) viral circulation

62 captured in the network reconstruction (Supplementary Figure 1). Edges in the network  
63 connected viral isolates with a median genetic similarity of 99.7%, indicating high degrees of  
64 phylogenetic similarity (Supplementary Figure 2). As expected, no clonal descent was identified  
65 between viruses of different subtypes. Moreover, the network recreates the phylogeny of known  
66 reassortant viruses, including the 2009 pandemic H1N1 and the recent 2013 H7N9 viruses,  
67 further validating the accuracy of our reconstruction. Small-world simulation studies and  
68 phylogenetic comparisons validated our method as being accurate in detecting reassortment  
69 events (Supplementary Figures 3 and 4).

70 To test whether reassortment or clonal descent was an advantageous strategy when switching  
71 hosts, we computed the weighted proportion of reassortant edges (out of all edges) occurring  
72 between hosts of the same or different species. When host species were different, reassortant  
73 edges were over-represented at 19 percentage points above a null permutation model  
74 (permutation test described in Materials & Methods) (Figure 1a), and when host species were the  
75 same, reassortant edges were under-represented by 7 percentage points relative to our null  
76 model. Thus, reassortment is a strongly favored strategy when influenza crosses between  
77 different host species.

78 We further sought to explore whether the predominant use of reticulate evolutionary processes in  
79 host switch events were correlated with host phylogenetic relatedness. To do this, we first  
80 computed the proportion of reassortment when switching between birds, non-human mammals,  
81 or humans, which are 3 divergent host groupings. We further sub-divided avian and mammalian  
82 categories into wild and domestic, to assess the impact of anthropological activity on the relative  
83 importance of reassortment in host switch interfaces (see Materials and Methods for how AIV  
84 was classified as domestic or wild). To ensure that the dataset was sufficient in scope to detect

85 reassortant viruses, we only considered host group transitions with at least 1000 descent events  
86 (both clonal and reassortant), or at least 10 reassortment events (dashed lines in Figures 1b & c).  
87 Nonetheless, all data are displayed for completeness.

88 Here, reassortment is over-represented relative to the null when host groups are different. Only  
89 two exceptions occur. The first is between wild birds, where reassortment is over-represented but  
90 host groups are not different. In this case, the “wild bird” label encompasses a wide range of host  
91 species, and as the natural reservoir for many diverse influenza viral subtypes, we expect to  
92 detect reassortment events more frequently between diverse species that may be distantly  
93 evolutionarily related. The second is the human-domestic mammal interface, where reassortment  
94 is not over-represented even though the host groups are different. In the case of human to  
95 domestic mammal host switches (reverse zoonosis), these are mostly well-documented reverse  
96 zoonotic events between human and swine hosts (15), where shared cellular receptors for viral  
97 entry (16) facilitates zoonotic and reverse zoonotic transmission. This may be a case of host  
98 convergent evolution inadvertently lowering the adaptive barrier to host switching. Under  
99 representation of reassortment at human-to-human transitions is expected because of the limited  
100 number of highly similar viral subtypes circulating in human populations, which likely obscures  
101 the distinction between reassortment and clonal descent. However, we also expect disease  
102 control measures to further limit the frequency of co-infection and likelihood of reassortment  
103 events. Thus, despite exceptions which are explained by known influenza biology (e.g. human to  
104 swine transmissions), reassortment is strongly favored over clonal evolution when crossing  
105 between evolutionarily distant hosts.

106 To further explore the relationship between host evolutionary divergence and the predominance  
107 of reassortment in transmission events between species, we compared a common phylogenetic

108 measure of species divergence, the cytochrome oxidase I (COI) gene, to the use of reassortment  
109 in host switch events. A subset of viral hosts, encompassing a variety of bird and mammal  
110 species, have had their cytochrome oxidase I (COI) gene sequenced as part of the barcode of life  
111 project (17). For the subset of edges in the network for which both the source and sink hosts have  
112 a COI gene sequence that fulfilled our criteria for consideration (as described above), we  
113 computed the percentage evolutionary distance between the two hosts (Materials and Methods).  
114 Applying a similar permutation test and assessment criteria as described for host groups above,  
115 we found a trend of increasing over-representation at higher evolutionary distances (Figure 1c).  
116 Thus, as host evolutionary distance, or (more broadly, quantitative niche dissimilarity) increases,  
117 reticulate evolution becomes increasingly favored for influenza virus niche switch events.

118 We have quantitatively defined the importance of reticulate evolutionary events in switching  
119 ecological niches, using an infectious disease data set with characteristics that are particularly  
120 well suited for answering this question. Beyond the viral world, recent reviews have asserted the  
121 importance of reticulate evolutionary events as a driver of speciation and niche diversification  
122 (18, 19), and recent studies have illustrated heightened fitness effects in hybrid populations (20,  
123 21). However, none have quantitatively tested the importance of reticulate evolutionary  
124 strategies in enabling ecological niche switches at a global scale, especially in comparison to  
125 clonal adaptation under drift and selection, a task feasible only in fast evolving organisms. To  
126 date, no studies have examined reticulate evolutionary processes in the context of quantified  
127 niche differences, as we have done here by measuring reassortment in the context of host  
128 evolutionary distance. Our study provides strong quantitative evidence supporting the hypothesis  
129 that reticulate evolutionary processes are advantageous relative to adaptation by drift for  
130 pathogen transfer between host species, and therefore more broadly, ecological niche switching.

131 We recognize that in this study, we have considered only a single pathogen for which abundant  
132 genomic data are available, and whose genomic and host tropic characteristics are suitable for  
133 this analysis. To specifically answer whether reticulate processes are favored over clonal  
134 transmission for other organisms, using these methods, depends on being able to acquire genome  
135 sequences with matched ecological niche metadata. We also note that the global influenza  
136 dataset will have unavoidable sampling biases. For example, human isolates predominate in the  
137 dataset, and consequently the human-associated subtypes H3N2 and H1N1 also dominate the  
138 dataset. Sequences from viral outbreaks will also be over-represented relative to isolates  
139 collected through routine surveillance sampling, and will unavoidably lead to a heightened  
140 detection of clonal descent in a single host species. In order to deal with this sampling bias, our  
141 permutation tests (for the host species and group labels) involve class labels of equal sizes. This  
142 allows us to calculate an expected distribution of proportions under ideal assumptions of equal  
143 sampling, which in turn forms the baseline for our conclusions.

144 In summary, using data available from a model zoonotic viral pathogen, we have shown that a  
145 reticulate evolutionary strategies are important in enabling pathogen host switches. For the  
146 influenza virus, reticulate evolution predominates when crossing between hosts. More broadly,  
147 the greater the quantitative difference between ecological niches, the greater the importance of  
148 reticulate evolutionary processes in enabling niche switches. While the quantitative importance  
149 of reticulate evolution may differ for different organisms evolving in different niches, we expect  
150 that further sequencing efforts from across broad domains of microbial life, and a further  
151 characterization and definition of their ecological niches, will elucidate whether this principle  
152 holds more broadly. Beyond its relevance to evolutionary ecology, reticulate evolution also has  
153 public health consequences. Reassortant influenza viruses have been implicated in all past



154 human pandemic strains (22-25), and the ancestry of HIV-1 involved a hybrid SIV (26). Hence,  
155 knowing how reticulate events shape disease emergence may help the ecology and evolution of  
156 infectious disease become a more predictive science, leading to insight important to disease  
157 prevention and mitigation (27).

158 **Acknowledgments**

159 The authors would like to thank Dr. Nan Li for technical assistance on graph computation during  
160 the earlier stages of this work. We would like to acknowledge funding from the NIH/NIAID  
161 CEIRS Program (Contract no.: HHSN272014000008C) and the MIT Department of Biological  
162 Engineering. The authors would also like to thank William R. Hesse of the MIT BE  
163 Communications Lab for assistance in reviewing the manuscript.

164

165 **Figures**

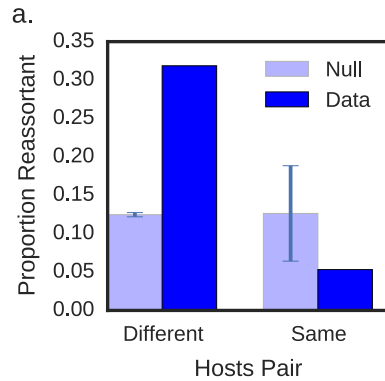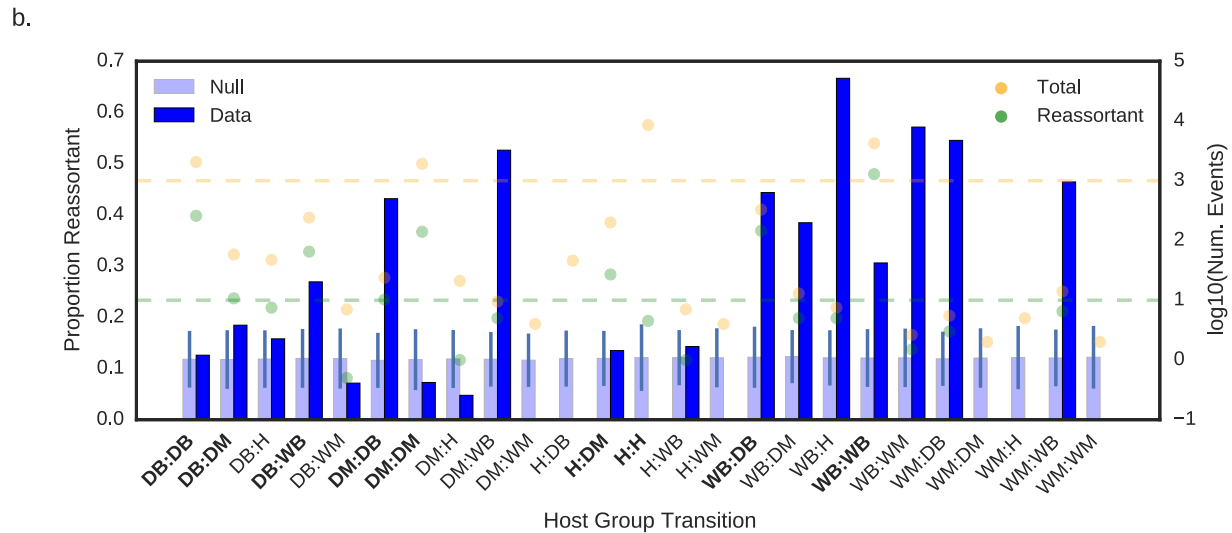

167

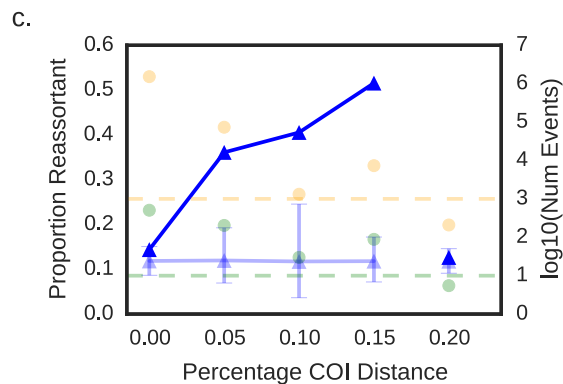

168

169 Figure 1. Proportion of reassortment events when crossing between (a) different or same hosts,  
 170 (b) different host groups, and (c) hosts of differing evolutionary distance as measured by  
 171 divergence in the cytochrome oxidase I (COI) gene. Reassortment is over-represented relative to

172 clonal descent in transmission across host barriers. (b) D: Domestic animal, H: Human, W: Wild,  
173 B: Bird, M: Mammal. Donor host is labeled first. Bolded x-axis tick labels indicate data for  
174 which the weighted sum of all edges exceeded 1000, or the weighted sum of reassortant edges  
175 exceeded 10. (a, b, c) Vertical error bars on the null permutation model represent 3 standard  
176 deviations from the mean from 100 simulations (a, b), or 95% density intervals from 500  
177 simulations (c). (b, c) Translucent dots indicate the weighted sum of clonal descent (yellow) and  
178 reassortment (green) events detected in the network under each host group transition. Horizontal  
179 yellow and green lines indicates threshold of values of 1000 and 10 respectively.

180

181 **References**

- 182 1. A. Hernández-López *et al.*, To tree or not to tree? Genome-wide quantification of  
183 recombination and reticulate evolution during the diversification of strict intracellular  
184 bacteria. *Genome Biol Evol.* **5**, 2305–2317 (2013).
- 185 2. D. Peris *et al.*, Population structure and reticulate evolution of *Saccharomyces eubayanus*  
186 and its lager-brewing hybrids. *Molecular Ecology.* **23**, 2031–2045 (2014).
- 187 3. R. J. Garten *et al.*, Antigenic and genetic characteristics of swine-origin 2009 A(H1N1)  
188 influenza viruses circulating in humans. *Science.* **325**, 197–201 (2009).
- 189 4. C. S. Smillie *et al.*, Ecology drives a global network of gene exchange connecting the  
190 human microbiome. *Nature.* **480**, 241–244 (2011).
- 191 5. U. Antonenka, C. Nölting, J. Heesemann, A. Rakin, Horizontal transfer of *Yersinia* high-  
192 pathogenicity island by the conjugative RP4 attB target-presenting shuttle plasmid. *Mol.*  
193 *Microbiol.* **57**, 727–734 (2005).
- 194 6. S. K. Remold, A. Rambaut, P. E. Turner, Evolutionary genomics of host adaptation in  
195 vesicular stomatitis virus. *Mol. Biol. Evol.* **25**, 1138–1147 (2008).
- 196 7. R. G. Webster, W. J. Bean, O. T. Gorman, T. M. Chambers, Y. Kawaoka, Evolution and  
197 ecology of influenza A viruses. *Microbiol. Rev.* **56**, 152–179 (1992).
- 198 8. N. K. Duggal, M. Emerman, Evolutionary conflicts between viruses and restriction factors  
199 shape immunity. *Nat. Rev. Immunol.* **12**, 687–695 (2012).
- 200 9. C. Li *et al.*, Reassortment between avian H5N1 and human H3N2 influenza viruses  
201 creates hybrid viruses with substantial virulence. *Proc. Natl. Acad. Sci. U.S.A.* **107**, 4687–  
202 4692 (2010).
- 203 10. A. Mehle, V. G. Dugan, J. K. Taubenberger, J. A. Doudna, Reassortment and mutation of  
204 the avian influenza virus polymerase PA subunit overcome species barriers. *J. Virol.* **86**,  
205 1750–1757 (2012).
- 206 11. T. T.-Y. Lam *et al.*, Reassortment Events among Swine Influenza A Viruses in China:  
207 Implications for the Origin of the 2009 Influenza Pandemic. *J. Virol.* **85**, 10279–10285  
208 (2011).
- 209 12. H. Tao, J. Steel, A. C. Lowen, Intra-host dynamics of influenza virus reassortment. *J.*  
210 *Virol.* **88**, JVI.00715–14–7492 (2014).
- 211 13. R. B. Squires *et al.*, Influenza Research Database: an integrated bioinformatics resource  
212 for influenza research and surveillance. *Influenza and Other Respiratory Viruses.* **6**, 404–  
213 416 (2012).
- 214 14. T. Jombart, R. M. Eggo, P. J. Dodd, F. Balloux, Reconstructing disease outbreaks from

- 215 genetic data: a graph approach. *Heredity*. **106**, 383–390 (2011).
- 216 15. M. I. Nelson, A. L. Vincent, Reverse zoonosis of influenza to swine: new perspectives on  
217 the human-animal interface. *Trends Microbiol.* **23**, 142–153 (2015).
- 218 16. W. Ma, R. E. Kahn, J. A. Richt, The pig as a mixing vessel for influenza viruses: Human  
219 and veterinary implications. *J Mol Genet Med.* **3**, 158–166 (2008).
- 220 17. S. Ratnasingham, P. D. N. Herbert, bold: The Barcode of Life Data System  
221 (<http://www.barcodinglife.org>). *Mol. Ecol. Notes.* **7**, 355–364 (2007).
- 222 18. K. M. Dlugosch, S. R. Anderson, J. Braasch, F. A. Cang, H. D. Gillette, The devil is in the  
223 details: genetic variation in introduced populations and its contributions to invasion.  
224 *Molecular Ecology.* **24**, 2095–2111 (2015).
- 225 19. J. Molofsky, S. R. Keller, S. Lavergne, M. A. Kaproth, M. B. Eppinga, Human-aided  
226 admixture may fuel ecosystem transformation during biological invasions: theoretical and  
227 experimental evidence. *Ecol Evol.* **4**, 899–910 (2014).
- 228 20. K. J. F. Verhoeven, M. Macel, L. M. Wolfe, A. Biere, Population admixture, biological  
229 invasions and the balance between local adaptation and inbreeding depression. *Proc. R.*  
230 *Soc. B.* **278**, 2–8 (2011).
- 231 21. S. R. Keller, P. D. Fields, A. E. Berardi, D. R. Taylor, Recent admixture generates  
232 heterozygosity–fitness correlations during the range expansion of an invading species.  
233 *Journal of Evolutionary Biology.* **27**, 616–627 (2014).
- 234 22. A. Wu *et al.*, Sequential Reassortments Underlie Diverse Influenza H7N9 Genotypes in  
235 China. *Cell Host Microbe.* **14**, 446–452 (2013).
- 236 23. J. Pu *et al.*, Evolution of the H9N2 influenza genotype that facilitated the genesis of the  
237 novel H7N9 virus. *Proc. Natl. Acad. Sci. U.S.A.*, 201422456 (2014).
- 238 24. T. T.-Y. Lam *et al.*, The genesis and source of the H7N9 influenza viruses causing human  
239 infections in China. *Nature.* **502**, 241–244 (2013).
- 240 25. R. Gao *et al.*, Human infection with a novel avian-origin influenza A (H7N9) virus. *N.*  
241 *Engl. J. Med.* **368**, 1888–1897 (2013).
- 242 26. E. Bailes *et al.*, Hybrid origin of SIV in chimpanzees. *Science.* **300**, 1713–1713 (2003).
- 243 27. B. R. Wasik, P. E. Turner, On the Biological Success of Viruses.  
244 <http://dx.doi.org/10.1146/annurev-micro-090110-102833>. **67**, 519–541 (2013).
- 245
